# Supplementary material for: Integrative Omics Reveals Metabolic and Transcriptomic Alteration of Nonalcoholic Fatty Liver Disease in Catalase Knockout Mice
Source: PubMed Central journal article supplement — Biomol Ther (Seoul). 2019 Jan 11;27(2):134–44. doi: 10.4062/biomolther.2018.175 (PMC6430223; doi:10.4062/biomolther.2018.175), 2019-01-11
Supplement: BT-27-134_sup_3.pdf [file BT-27-134_sup_3.pdf]

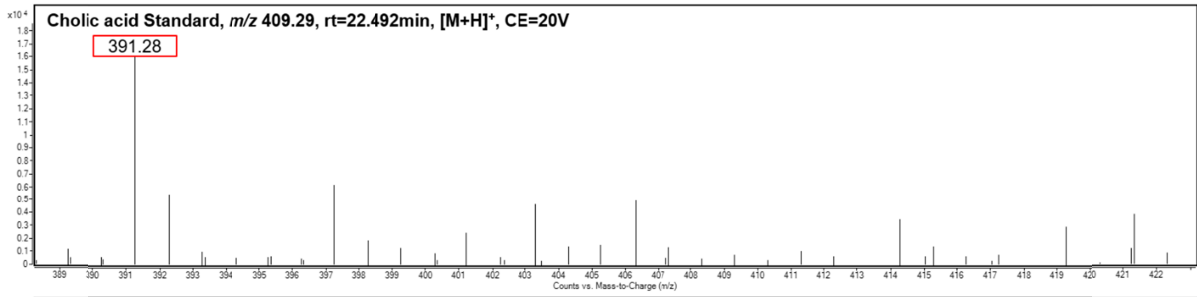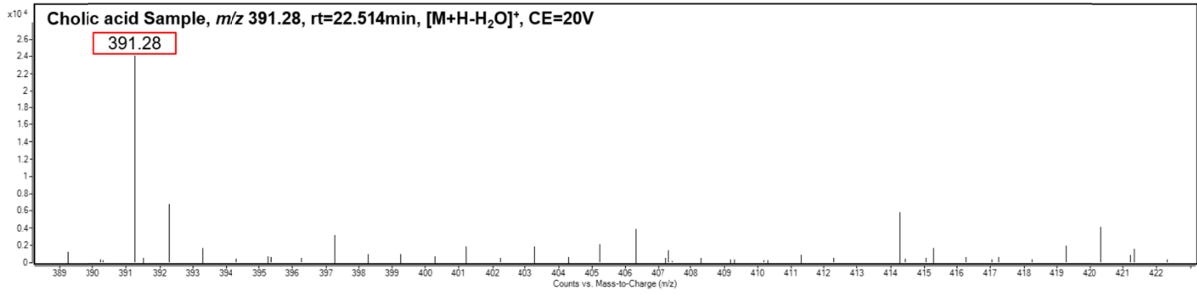

### Supplementary figure

Figure S1. Cholic acid validation with authentic standard

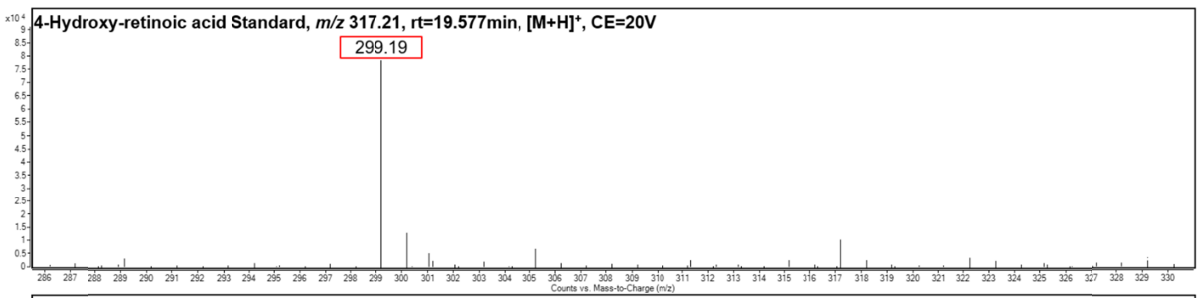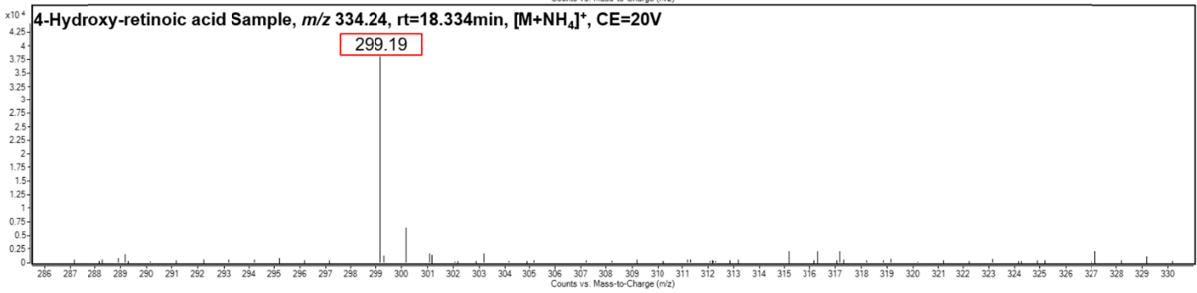

Figure S2. 4-Hydroxy-retinoic acid validation with authentic standard

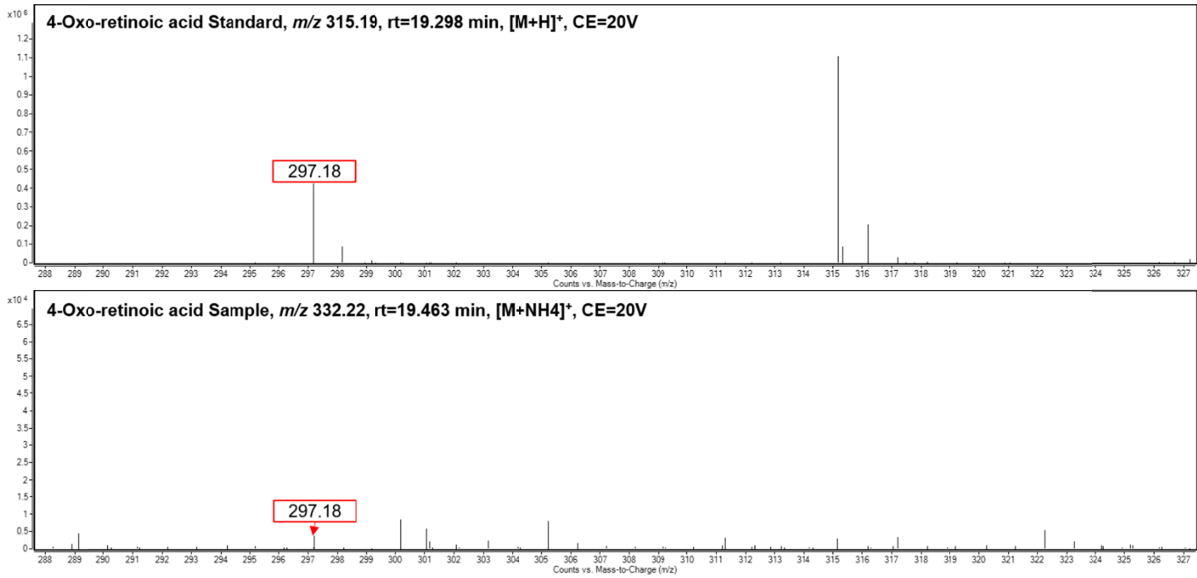

**Figure S3. 4-Oxo-retinoic acid validation with authentic standard**

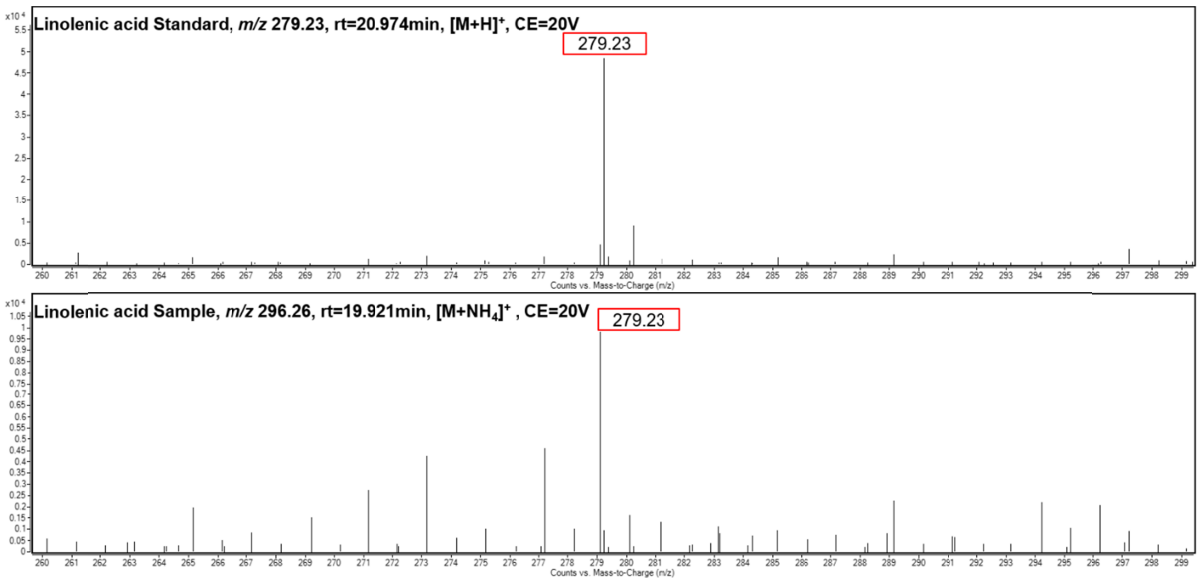

**Figure S4. Linolenic acid validation with authentic standard**

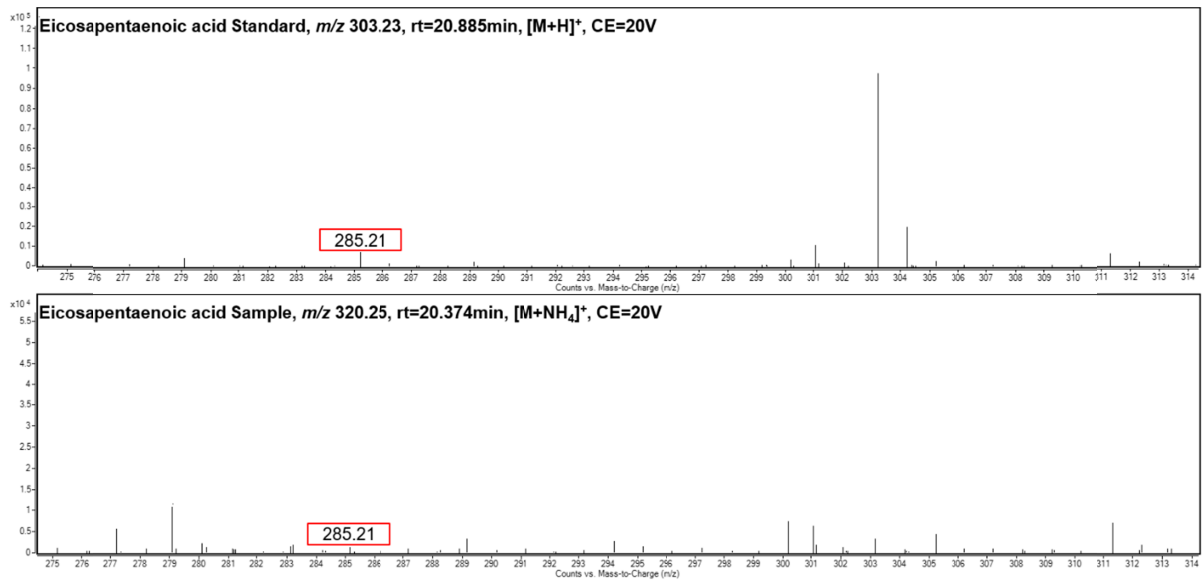

**Figure S5. Eicosapentaenoic acid validation with authentic standard**
